# Supplementary material for: Expectancy-based rhythmic entrainment as continuous Bayesian inference
Source: PLOS journal article supplement (doi:10.1371/journal.pcbi.1009025), 2021-06-09
Supplement: S3 (10.1371/journal.pcbi.1009025.s003) [file journal.pcbi.1009025.s003]

### S3 Text: Simulation parameters.

All code used to create figures in this manuscript is available at <https://github.com/joncannon/PIPPET>.

PIPPET simulations were conducted by numerical simulation of (3) with  $dt = .001$  and initialized with  $\phi_0 = 0$  and  $V_0 = .0002$ . Parameters for the simulations shown in each figure are listed below, with  $t_n$  used to denote simulated event times (in units of seconds).

**Fig 2:**  $\phi_1 = .5$ ,  $v_1 = .0005$ ,  $\lambda_1 = 1$ ,  $\mu_t = .43$ ,  $V_t = .001$ ,  $\lambda_0 = 0$  or  $.5$ , except as otherwise specified.

**Fig 3A:**

$$\{t_n\} = \{0, .150, .5, .75, .9, 1.25\}$$

$$\{\phi_i\} = \{0, .15, .25, .4, .5, .65, .75, .9, 1, 1.15, 1.25, 1.4\}$$

$$\{v_i\} = \{.0001, .0005, .0001, .0005, .0001, .0005, .0001, .0005, .0001, .0005\}$$

$$\{\lambda_i\} = \{.05, .01, .05, .01, .05, .01, .05, .01, .05, .01\}$$

$$\lambda_0 = .01$$

$$\sigma = .05$$

**Fig 3B:** Same as Fig 3A, but with  $t_3 = .45$  (50 ms negative event time shift).

**Fig 3C:** Same as Fig 3A, but with  $\{t_n\} = \{0, .15, .5, .7, .85, 1.2\}$  (50 ms negative phase shift).

**Fig 4A:** Same as Fig 3, but with  $\{t_n\} = \{0, .150, .65, .9, 1.15, 1.25\}$ .

**Fig 4B:** Same as Fig 4A, but with  $\sigma = .3$ .

**Fig 4C:** Same as Fig 4A, but with additional tap times and tap feedback expectations:

$$\{t_n^{tap}\} = \{\phi_i^{tap}\} = \{0, .5, 1\}$$

$$v_i^{tap} = .0005$$

$$\lambda_i^{tap} = .05$$

$$\lambda_0^{tap} = .01$$

PATIPPET simulations were conducted by numerical simulation of (4) with  $dt = .001$ . Parameters for the simulations shown in each figure are listed below.

**Fig 5:**

$$t_n = \frac{n}{1.2Hz}$$

$$\phi_i = i$$

$$v_i = .005$$

$$\lambda_i = .02$$

$$\lambda_0 = .0001$$

$$\sigma = .05$$

$$\sigma_\theta = .05$$

$$\boldsymbol{\mu}_0 = \begin{pmatrix} 0 \\ 1 \end{pmatrix}$$

$$\mathbf{V}_0 = \begin{pmatrix} .001 & 0 \\ 0 & .04 \end{pmatrix}$$

**Fig 6:** In four simulations, we set the inter-onset interval  $\Delta$  to .4s, 0.7s, 1.0s, and 1.3s. In each simulation, we set the perturbation  $\delta$  to  $\frac{\Delta}{25}$ .

$$\{t_n\} = \{\Delta, 2\Delta, 3\Delta, 4\Delta + \delta\}$$

$$\phi_i = i$$

$$v_i = .0002$$

$$\lambda_i = .02$$

$$\lambda_0 = 10^{-5}$$

$$\sigma = .01$$

$$\sigma_\theta = .01$$

$$\boldsymbol{\mu}_0 = \begin{pmatrix} 0 \\ 1 \end{pmatrix}$$

$$\mathbf{V}_0 = \begin{pmatrix} 10^{-4} & 0 \\ 0 & 10^{-4} \end{pmatrix}$$

**Fig 7A:**

$$\phi_i = .25i$$

$$v_i = .0001$$

$$\lambda_i = 1$$

$$\lambda_0 = .0001$$

$$\sigma = .015$$

$$\sigma_\theta = .2$$

$$\boldsymbol{\mu}_0 = \begin{pmatrix} 0 \\ 1 \end{pmatrix}$$

$$\mathbf{V}_0 = \begin{pmatrix} .0001 & 0 \\ 0 & .005 \end{pmatrix}$$

955 Left:  $\{t_n\} = \{.25, .5, .75, 1\}$ . Right:  $\{t_n\} = \{1\}$ .

956 **Fig 7B:** Same as Fig 7A, but with  $\lambda_i = 0$  and  $\lambda_0 = 4$ .
